# Supplementary material for: AAV-CRISPR Gene Editing Is Negated by Pre-existing Immunity to Cas9
Source: PubMed Central journal article supplement — Mol Ther. 2020 Apr 19;28(6):1432–41. doi: 10.1016/j.ymthe.2020.04.017 (PMC7264438; doi:10.1016/j.ymthe.2020.04.017), 2020-04-19
Supplement: mmc1.pdf [file mmc1.pdf]

YMTHE, Volume 28

## **Supplemental Information**

### **AAV-CRISPR Gene Editing Is Negated**

#### **by Pre-existing Immunity to Cas9**

**Ang Li, Mark R. Tanner, Ciaran M. Lee, Ayrea E. Hurley, Marco De Giorgi, Kelsey E. Jarrett, Timothy H. Davis, Alexandria M. Doerfler, Gang Bao, Christine Beeton, and William R. Lagor**

SUPPLEMENTAL FIGURE S1

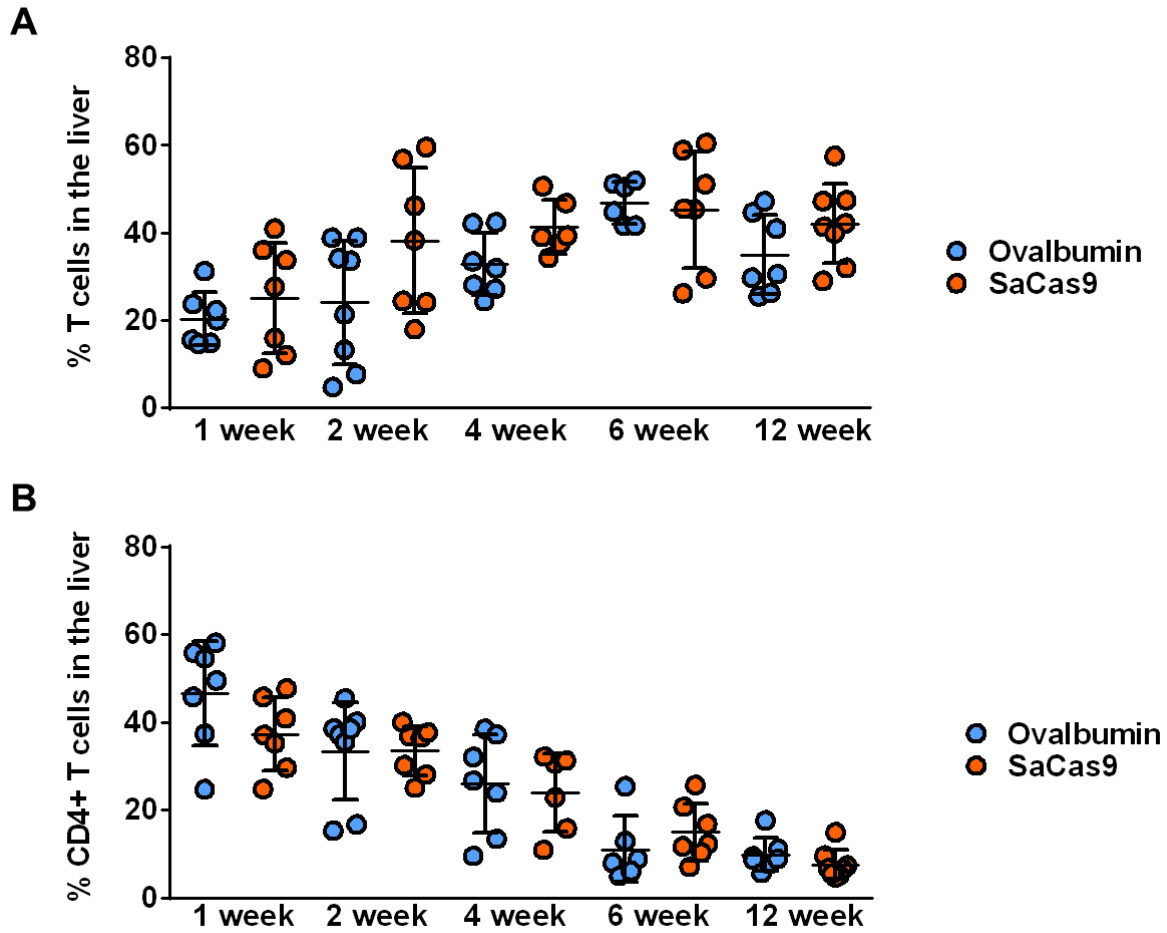

**Supplemental Figure S1. T-cell populations in the liver. A)** T-cells in the liver as a percentage of total lymphocytes measured by flow cytometry. **B)** CD4<sup>+</sup> T-cells as a percentage of total lymphocytes in the liver measured via flow cytometry.

SUPPLEMENTAL FIGURE S2

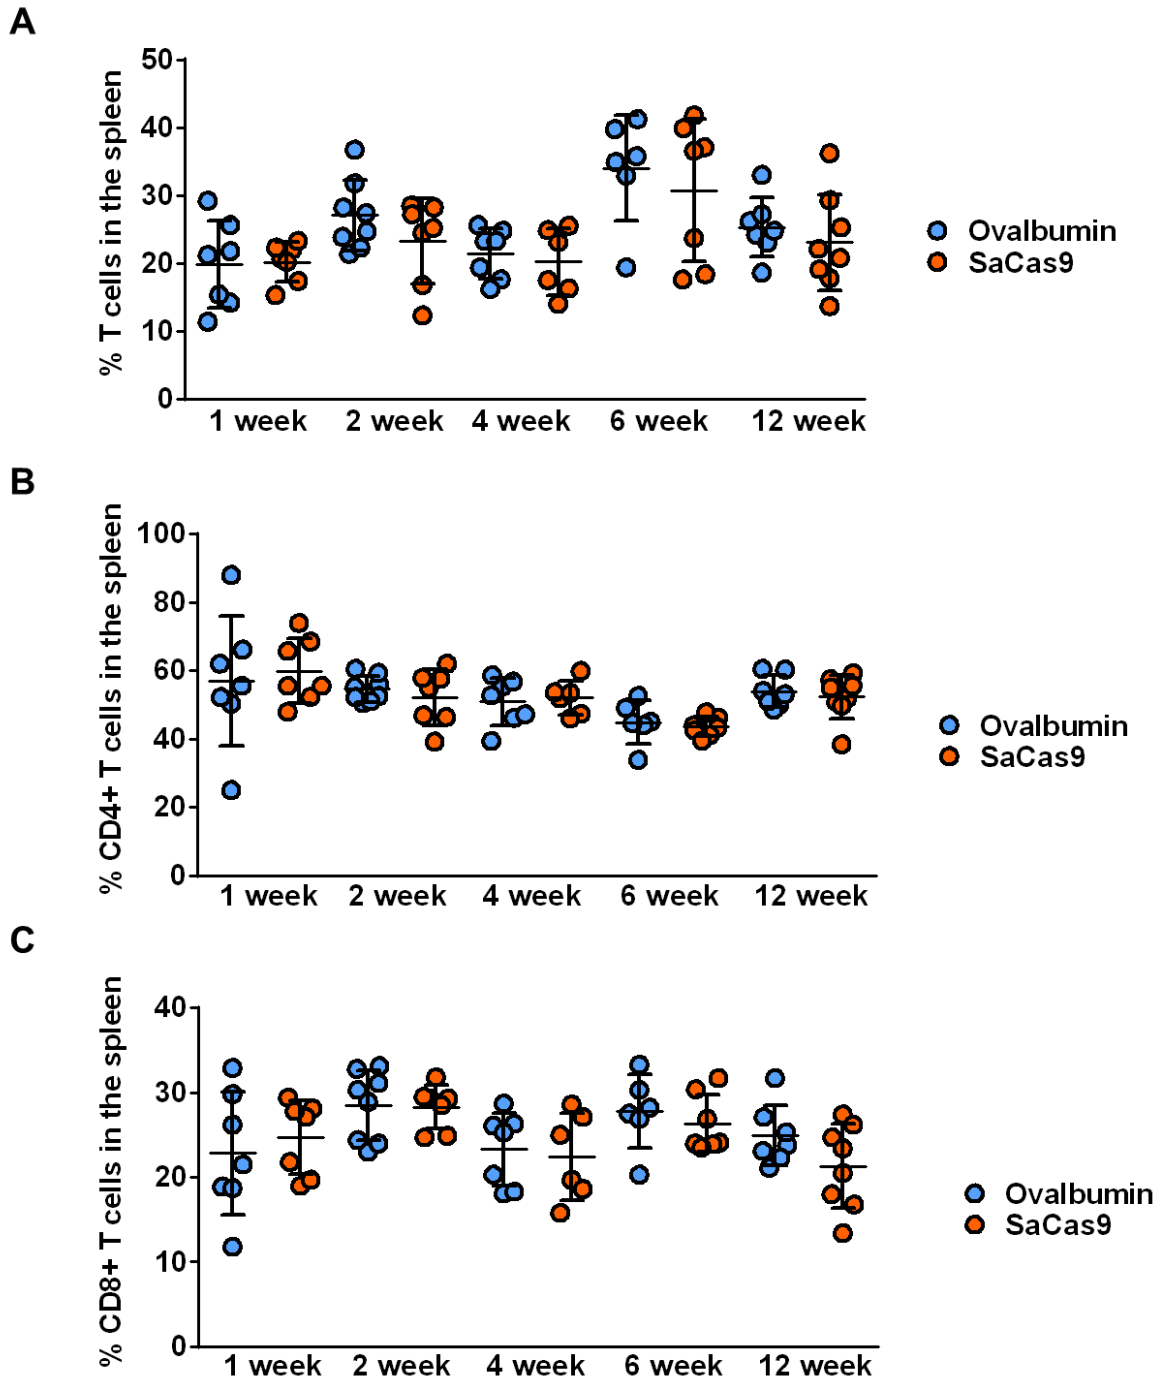

**Supplemental Figure S2. T-cell populations in the spleen.** **A)** T-cells as a percentage of total lymphocytes in the spleen measured by flow cytometry. **B)** CD4<sup>+</sup> T-cells as a percentage of total lymphocytes in the spleen measured by flow cytometry. **C)** CD8<sup>+</sup> T-cells as a percentage of total lymphocytes in the spleen measured by flow cytometry.

SUPPLEMENTAL FIGURE S3

**A**

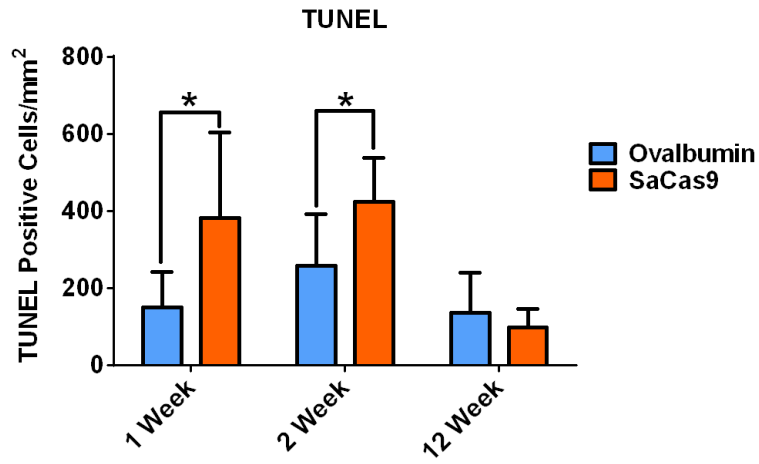

**B**

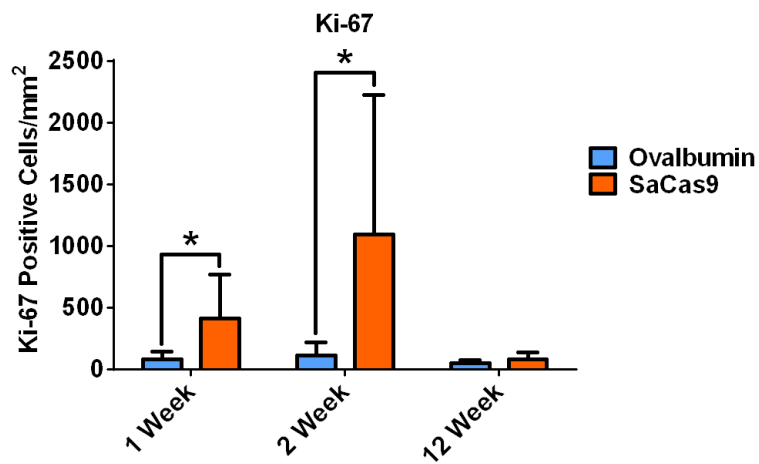

**Supplemental Figure S3. Apoptosis and proliferation analysis of the liver via immunohistochemistry. A)** Total cells positive for TUNEL staining per square millimeter of tissue area. **B)** Total positive cells for Ki-67 staining per square millimeter of tissue area.

**SUPPLEMENTAL FIGURE S4**

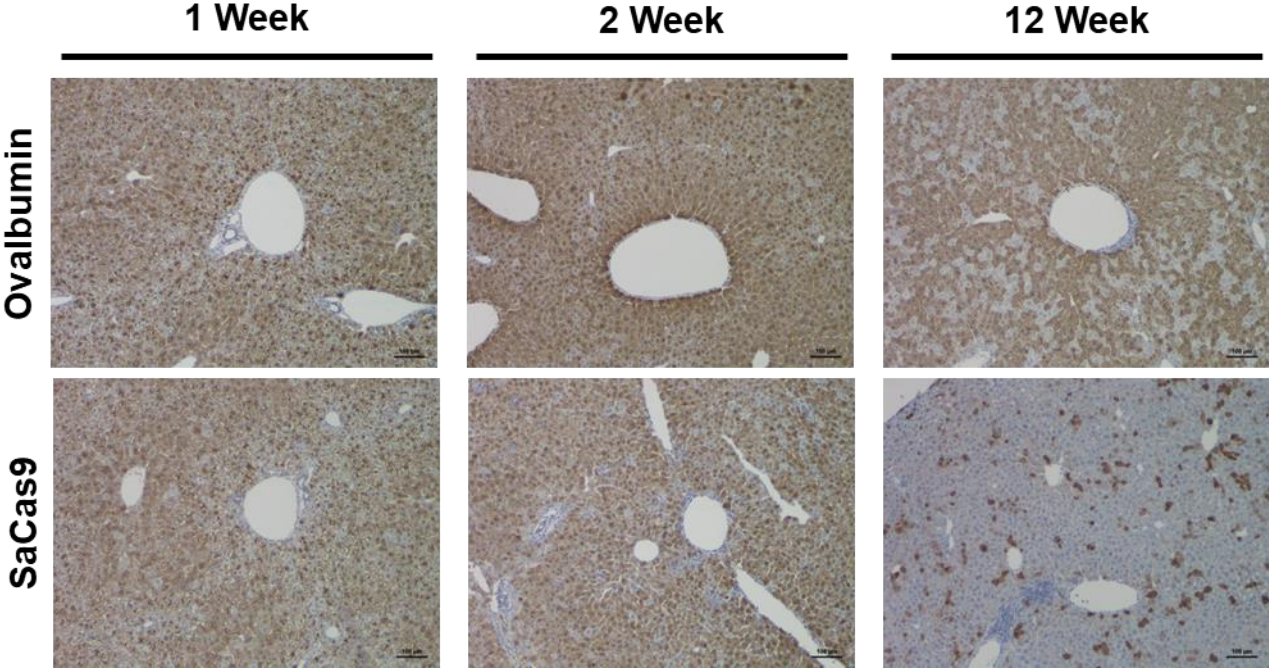

**Supplemental Figure S4. Immunohistochemistry of GFP in mouse liver.** Representative immunohistochemistry staining for GFP in mouse liver sections at 1, 2, and 12 weeks in mice pre-immunized with ovalbumin or SaCas9

SUPPLEMENTAL FIGURE S5

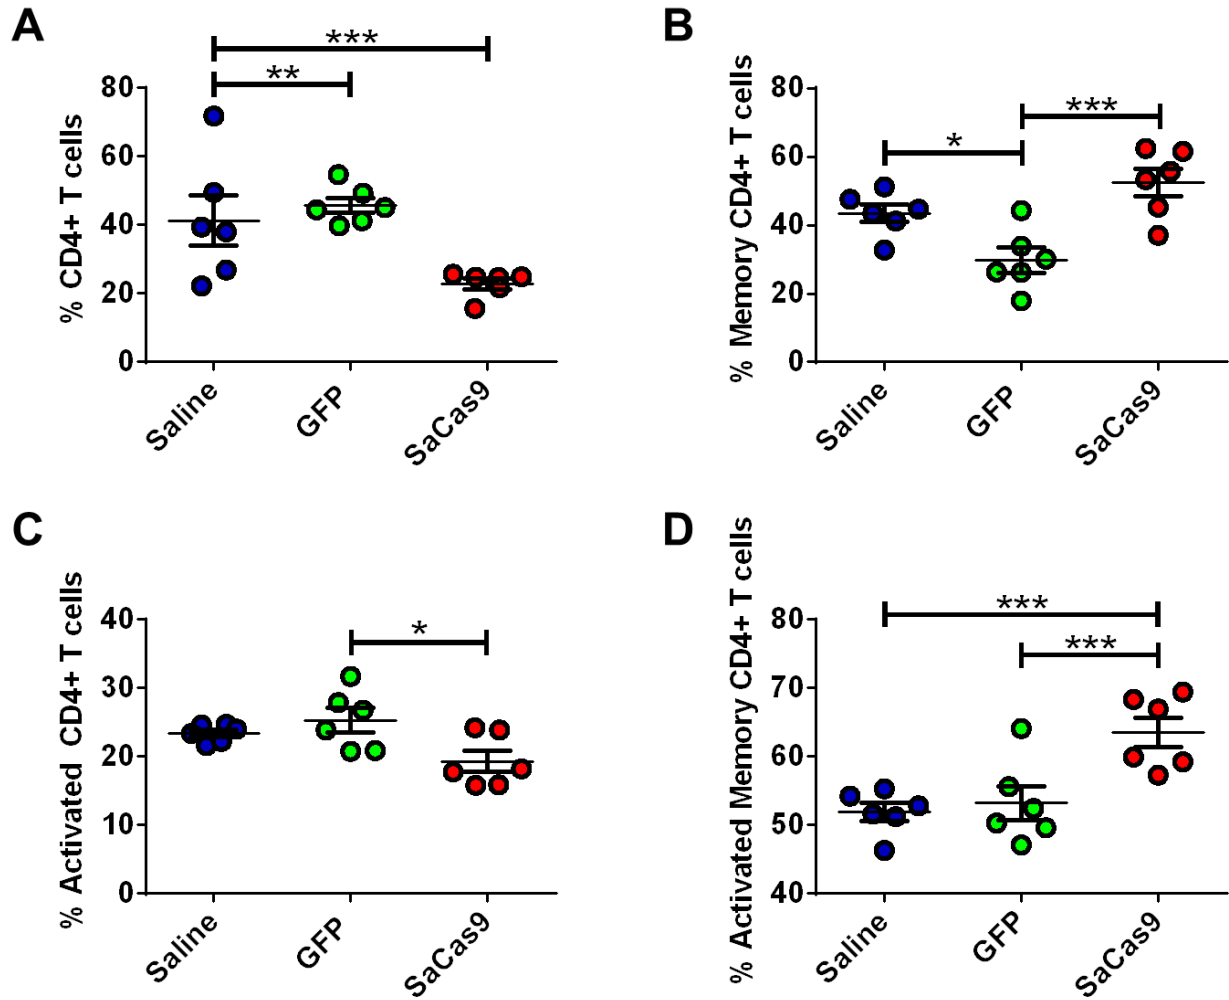

**Supplemental Figure S5. CD4<sup>+</sup> T-cell responses in the liver. A)** CD4<sup>+</sup> T-cells as a percentage of total lymphocytes in the liver measured via flow cytometry. **B)** Memory CD4<sup>+</sup> T-cells as a percentage of total CD4<sup>+</sup> T-cells. **C)** Activated CD4<sup>+</sup> T-cells as a percentage of total CD4<sup>+</sup> T-cells. **D)** Activated memory CD4<sup>+</sup> T-cells as a percentage of memory CD4<sup>+</sup> T-cells.

SUPPLEMENTAL FIGURE S6

**A**

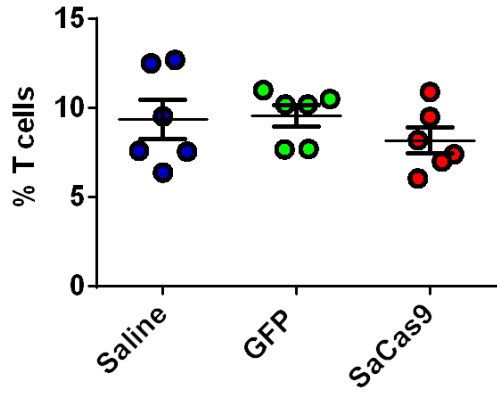

**B**

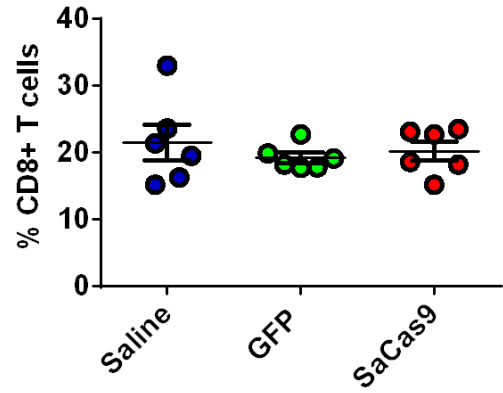

**C**

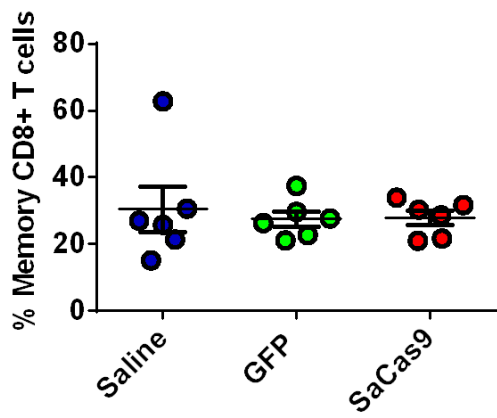

**D**

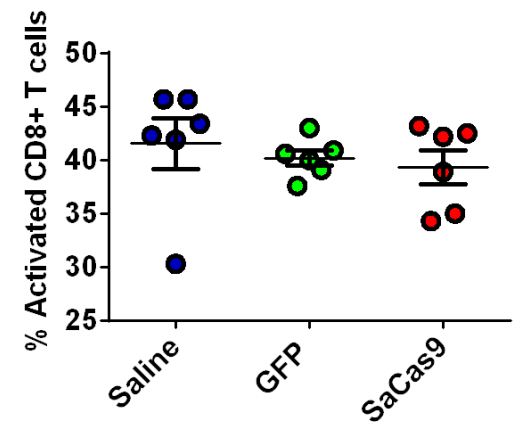

**E**

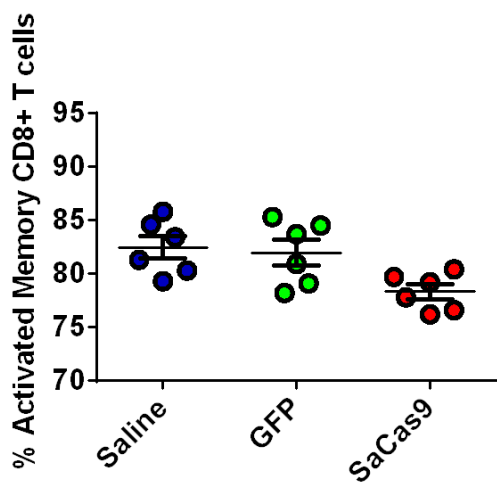

**F**

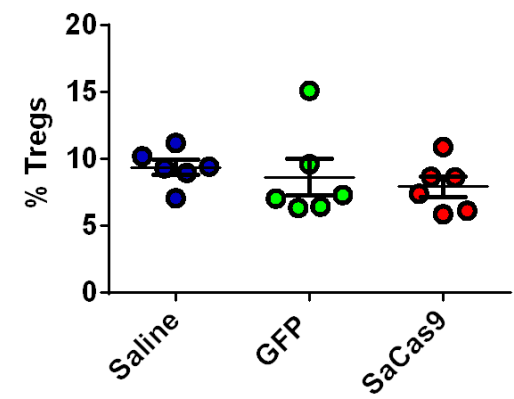

**Supplemental Figure S6. CD8<sup>+</sup> T-cell and Treg responses in the spleen.** **A)** T-cells as a percentage of total lymphocytes in the spleen measured via flow cytometry. **B)** CD8<sup>+</sup> T-cells as a percentage of T-cells **C)** Percentage of memory CD8<sup>+</sup> to total CD8<sup>+</sup> T-cells. **D)** Percentage of activated CD8<sup>+</sup> T-cells to total CD8<sup>+</sup> T-cell population. **E)** Percentage of activated memory CD8<sup>+</sup> T-cells to total CD8<sup>+</sup> T-cell population. **F)** Tregs as a percentage of total lymphocytes in the spleen measured via flow cytometry. N=6 per condition.

**SUPPLEMENTAL FIGURE S7**

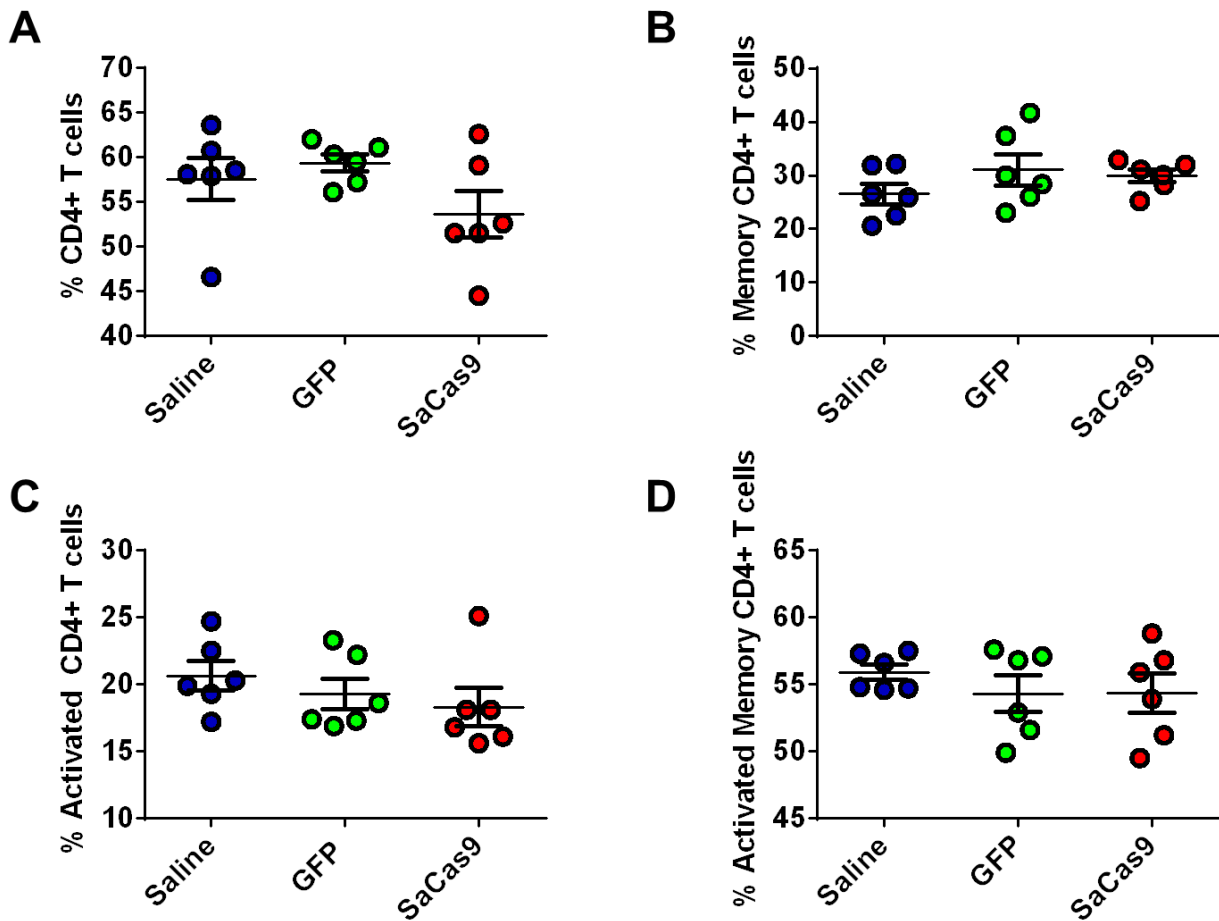

**Supplemental Figure S7. CD4<sup>+</sup> T-cell responses in the spleen.** **A)** CD4<sup>+</sup> T-cells as a percentage of total lymphocytes in the spleen measured via flow cytometry. **B)** Memory CD4<sup>+</sup> T-cells as a percentage of total CD4<sup>+</sup> T-cells. **C)** Activated CD4<sup>+</sup> T-cells as a percentage of total CD4<sup>+</sup> T-cells. **D)** Activated memory CD4<sup>+</sup> T-cells as a percentage of memory CD4<sup>+</sup> T-cells.



**SUPPLEMENTAL TABLE S1**

| <b>Description</b>                 | <b>Vendor</b>     | <b>Catalog Number</b> | <b>Figures</b>       |
|------------------------------------|-------------------|-----------------------|----------------------|
| Anti-CD3 conj. to Pacific Blue     | BD Pharmigen      | 558214                | 2B, 4, S1, S2, S5-S7 |
| Anti-CD4 conj. to Phycoerythrin    | Invitrogen        | 12-0041-83            | 2B, S1, S2           |
| Anti-CD4 conj. to Pacific Orange   | Thermo Fisher     | 79-0042-82            | 4, S5, S7            |
| Anti-CD-8 conj. to Alexa Fluor 647 | Novus Biologicals | AP-MAB 0708           | 2B, 4, S1, S2, S6    |
| Anti-CD25 conj. to Alexa Fluor 750 | Novus Biologicals | FAB2438S              | 4, S5-S7             |
| Anti-CD62L conj. to FITC           | Sino Biological   | 50045-R414-F          | 4, S5-S7             |
| Anti-Foxp3 conj. to PE-Cy5         | eBioscience       | 15-5773-82            | 4, S6                |

**Supplemental Table S1.** List of antibodies used for flow cytometry analysis with vendors, catalogue numbers, and figures using the corresponding antibody

**SUPPLEMENTAL TABLE S2**

| <b>Description</b>        | <b>Vendor</b>           | <b>Catalogue Number</b> | <b>Dilution</b> |
|---------------------------|-------------------------|-------------------------|-----------------|
| Rabbit Anti HA-Tag        | Cell Signaling          | 3350S                   | 1 to 1000       |
| Rabbit Anti GFP           | Fisher Scientific       | A-11122                 | 1 to 3000       |
| Mouse Anti Beta-Tubulin   | Hybridoma Bank          | E7                      | 1 to 250        |
| Rabbit Anti Ldlr          | Gene Ness               | N/A                     | 1 to 5000       |
| Goat Anti-Rabbit (680 nm) | RockLand Immunochemical | RL6111440020.5          | 1 to 10000      |
| Goat Anti-Mouse (800 nm)  | RockLand Immunochemical | RL6111450020.5          | 1 to 10000      |

**Supplemental Table S2.** List of antibodies used for western blot analysis with corresponding vendors, catalogue numbers, and dilutions used in this study.

**SUPPLEMENTAL TABLE S3**

| <b>Name</b> | <b>Sequence (5' to 3')</b>     | <b>Purpose</b>                    |
|-------------|--------------------------------|-----------------------------------|
| EmGFP_F1    | CAAGCTGACCCTGAAGTTCATC         | EmGFP TIDE Sequencing             |
| PoIA_R      | CACACAAAAAACCAACACACAGATCTAATG | EmGFP, SaCas9 TIDE Sequencing     |
| HLP_F       | CCCTGTTTGCTCCTCCGATAAC         | SaCas9 TIDE Sequencing            |
| mTTP_F      | GACCTCTGCTTGACCTATAGTCACATGAC  | mMttp Exon 2 Forward Primer       |
| mTTP_R      | GCAGCCTGGAGCACGTATC            | mMttp Exon 2 Reverse Primer       |
| Ldlr_F      | CCGGAGGACATTGTCCTGTTC          | mLdlr Exon 14 Forward TIDE Primer |
| Ldlr_R      | CTCAGGGAATCTGCTTCAGCAAC        | mLdlr Exon 14 Reverse TIDE Primer |
| ApoE_F      | GGAAGGAGAGAGCCAATTCCCTC        | mApoE Exon 2 Forward TIDE Primer  |
| ApoE_R      | CGCTTGTTGCCAGAAAGTTGAG         | mApoE Exon 2 Reverse TIDE Primer  |
| EmGFP_F2    | GCATCGACTTCAAGGAGGAC           | EmGFP qPCR Forward Primer         |
| EmGFP_R1    | TGCACGCTGCCGTCCTCGATG          | EmGFP qPCR Reverse Primer         |
| SaCas9_F    | CCGTCTGTAAGAGAAGCTTCATC        | SaCas9 qPCR Forward Primer        |
| SaCas9_R    | CCACCTCATAGTTGAAGGGGTTG        | SaCas9 qPCR Reverse Primer        |

**Supplemental Table S3.** List of qPCR primers with corresponding targets used in this study.
